# Supplementary material
Source: PubMed Central journal article supplement (PMC6145144)
Supplement: NIHMS1501935-supplement-1.pdf [file NIHMS1501935-supplement-1.pdf]

**Supplemental Table S1. Sequences for primers and oligonucleotides used in the study.**

| Gene                       |                                        | Primer Sequence               | T <sub>m</sub> (°C) | Amplicon Size (bp) |
|----------------------------|----------------------------------------|-------------------------------|---------------------|--------------------|
| <i>Ii25</i>                | F                                      | 5'-TGCTAGAGGATGCTGTTGTG-3'    | 54.7                | 88                 |
|                            | R                                      | 5'-GGAAAGGAGCCAGGAGTATG-3'    | 54.9                |                    |
| <i>Ii33</i>                | F                                      | 5'-TGCCTCCCTGAGTACATACA-3'    | 55.0                | 106                |
|                            | R                                      | 5'-CTGGTCTTGCTCTTGGTCTTT-3'   | 55.0                |                    |
| <i>Tslp</i>                | F                                      | 5'-AGAGGACCACTGGTGTATTATTC-3' | 54.4                | 112                |
|                            | R                                      | 5'-ACGGTCTATTGCTCATTTCCC-3'   | 54.9                |                    |
| <i>Rela</i><br>(NF-κB/p65) | F                                      | 5'-AGGCTTCTGGGCCTTATGTG-3'    | 61.6                | 111                |
|                            | R                                      | 5'-TGCTTCTCTGCCAGGAATAC-3'    | 61.6                |                    |
| <i>Ccl11</i><br>(eotaxin)  | F                                      | 5'-CACTAACCCAGAGCCCTAAGAAC-3' | 54.9                | 128                |
|                            | R                                      | 5'-CATAATGACTTCCAGTCCCATCT-3' | 54.2                |                    |
| <i>Muc5ac</i>              | F                                      | 5'-CAGGACTCTCTGAAATCGTACCA-3' | 61.1                | 129                |
|                            | R                                      | 5'-GAAGGCTCGTACCACAGGG-3'     | 61.7                |                    |
| <i>Gapdh</i>               | F                                      | 5'-GGACGCATTGGTCGTCTGG-3'     | 63.0                | 204                |
|                            | R                                      | 5'-TTTGCCTGGTACGTGTTGAT-3'    | 60.2                |                    |
| <i>Muc5ac</i><br>PPRE1     | F                                      | 5'-GTGCTCAGAACAGCCTGA-3'      | 55.1                | 92                 |
|                            | R                                      | 5'-GAATGGCAGGAAAGGGAGAG-3'    | 55.4                |                    |
| <i>Muc5ac</i><br>PPRE2     | F                                      | 5'-CTTGGCCCAGCCTCAG-3'        | 63.0                | 251                |
|                            | R                                      | 5'-GGCATAGGGAAGGGCTTGA-3'     | 64.0                |                    |
| <i>Actb</i><br>(β-Actin)   | Cat # 13653, Cell Signaling Technology |                               |                     |                    |

| Element                | Oligonucleotide sequence              |
|------------------------|---------------------------------------|
| <i>MUC5AC</i> PPRE1    | 5'-ACTCAGACAGGACAAAGGGCCCGGTATGGA-3'  |
| <i>MUC5AC</i> PPRE2    | 5'-ACTCAGACTGTTTCAGAGGTCACGGTATGGA-3' |
| <i>MUC5AC</i> PPRE1 Mu | 5'-ACTCAGACAGACTAAAGGGCCCGGTATGGA-3'  |
| <i>MUC5AC</i> PPRE2 Mu | 5'-ACTCAGACCAGGGTGAGGTCACGGTATGGA-3'  |
| <i>MUC5AC</i> PPRE     | 5'-ACTCAGACAAGTCAGAGGCCACGGTATGGA-3'  |
| Non Specific Oligo     | 5'-ACTCAGACTGGGGCTGGAGTGCAGGTATGGA-3' |

## Supplemental Figures:

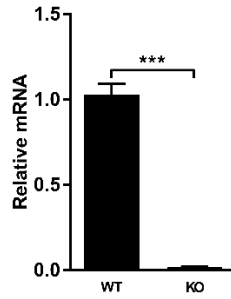

**FIGURE S1. AEC-PPAR $\gamma$  knockout.** AECs were collected from lung sections using laser capture microdissection, as described in *Materials and Methods*. PPAR $\gamma$  mRNA levels were measured by real-time RT-PCR. The data are expressed as the mean  $\pm$  SD with  $n = 3$  mice/group; \*\*\* $P < 0.001$ .
